# Supplementary material
Source: Springer Nature journal article supplement (https://www.springermedizin.de/resource/supplementary/12916_2011_383_MOESM2_ESM.pdf/9599838)

1a

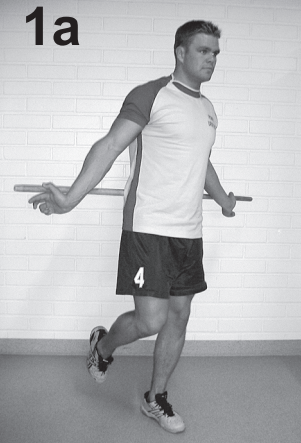

1b

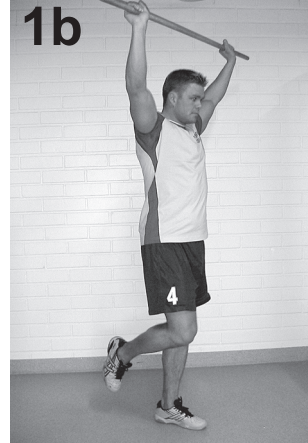

2a

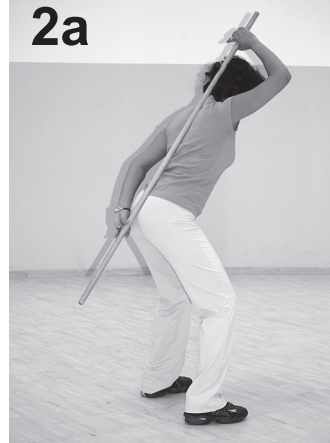

2b

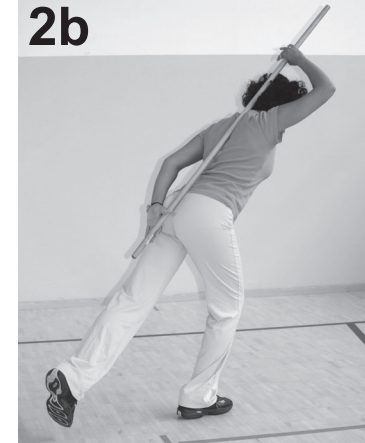

3a

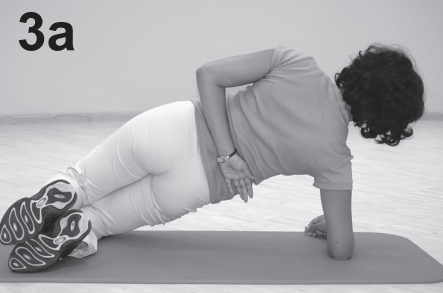

3b

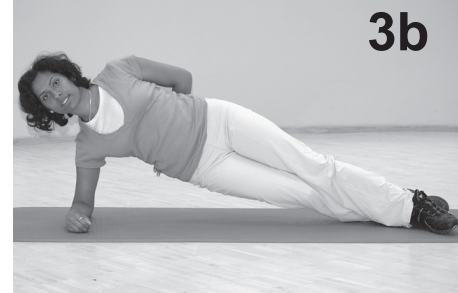

3c

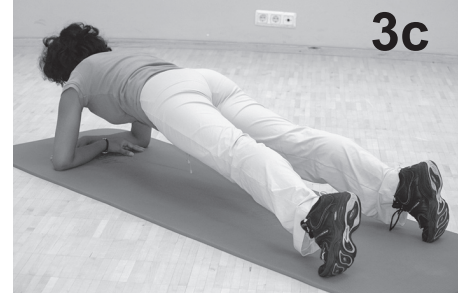

4

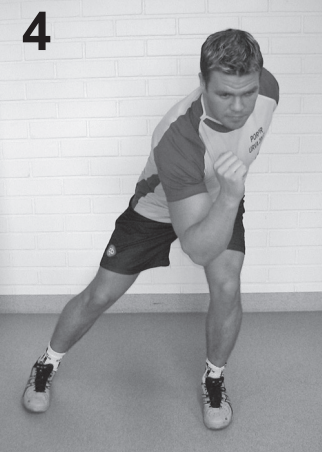

5a

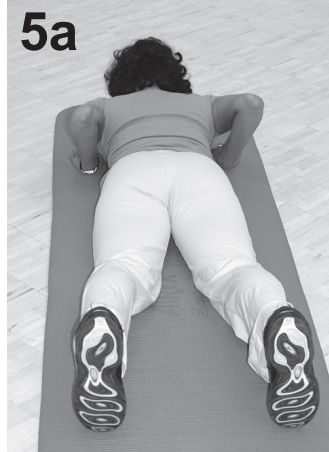

5b

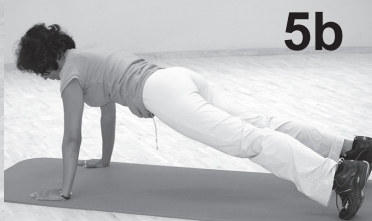

5c

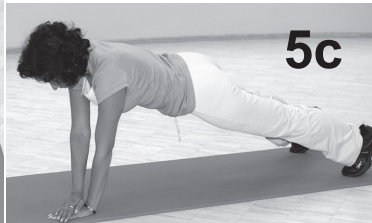

6

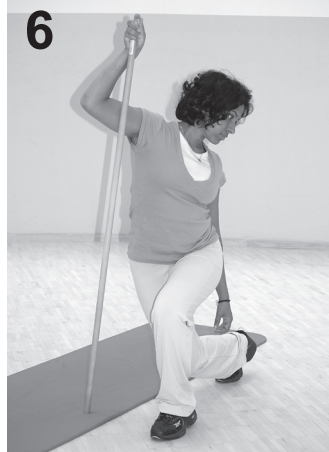

7

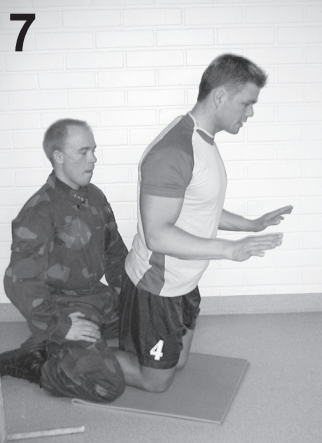

8

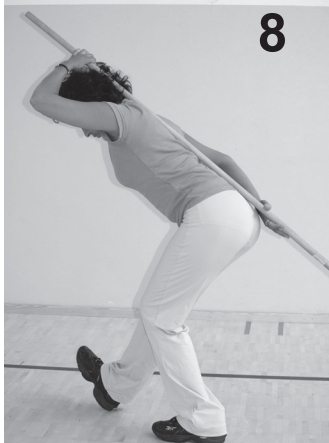

9a

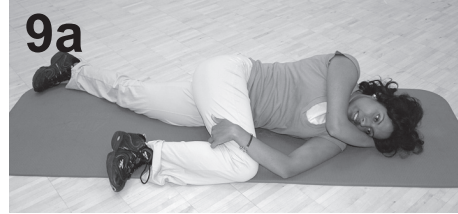

9b

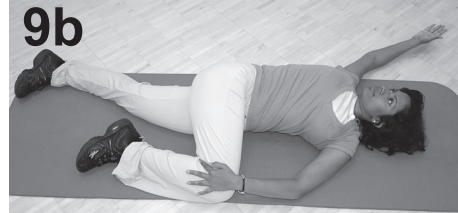

Supplement: MOESM2 [file 9599838]
